# Supplementary material
Source: publisher figshare collection journal article supplement (https://acs.figshare.com/ndownloader/files/3976978)
Supplement: Supplementary file 1 [file 3976978]

## Supporting Information

Studies of the Structures and Bonding of Unsaturated

Dirhenium Carbonyl Cluster Complexes

Richard D. Adams\*, Yuen Onn Wong and Qiang Zhang

Department of Chemistry and Biochemistry

University of South Carolina

Columbia, SC, 29208

**Crystallographic Analyses:** Red crystals of **1** suitable for x-ray diffraction analyses were obtained from a methylene chloride/hexane solution by slow evaporation of a solvent at 25 °C. Yellow crystals of **3** suitable for x-ray diffraction analyses were obtained from a benzene/octane solution by slow evaporation of a solvent at 15 °C. Each data crystal was glued onto the end of a thin glass fiber. X-ray intensity data were measured by using a Bruker SMART APEX CCD-based diffractometer by using Mo K $\alpha$  radiation ( $\lambda = 0.71073$  Å). The raw data frames were integrated with the SAINT+ program by using a narrow-frame integration algorithm.<sup>1</sup> Correction for Lorentz and polarization effects were also applied using SAINT+. An empirical absorption correction based on the multiple measurement of equivalent reflections was applied using the program SADABS. All structures were solved by a combination of direct methods and difference Fourier syntheses, and were refined by full-matrix least-squares on  $F^2$  by using the SHELXTL software package.<sup>2</sup> All non-hydrogen atoms were refined with anisotropic thermal parameters. Hydrogen atoms were placed in geometrically idealized positions and included as standard riding atoms during the least-squares refinements. Crystal data, data collection parameters, and results of the analyses are listed in Table 1. Compounds **1** and **3** crystallized in the monoclinic crystal system. For **1** the space group  $P2_1/n$  was uniquely identified on the basis of the systematic

absences observed in the data. For **3** the space group  $P2_1/n$  was uniquely identified on the basis of the systematic absences observed in the data.  $ax,ax\text{-Re}_2(\text{CO})_8(\text{PPh}_3)_2$  crystallized in the monoclinic space group. The space group  $C2/c$  was identified on the basis of the systematic absences in the data and by the successful solution and refinement of the structure. Compound **1** and  $ax,ax\text{-Re}_2(\text{CO})_8(\text{PPh}_3)_2$  both crystallized on a center of symmetry.

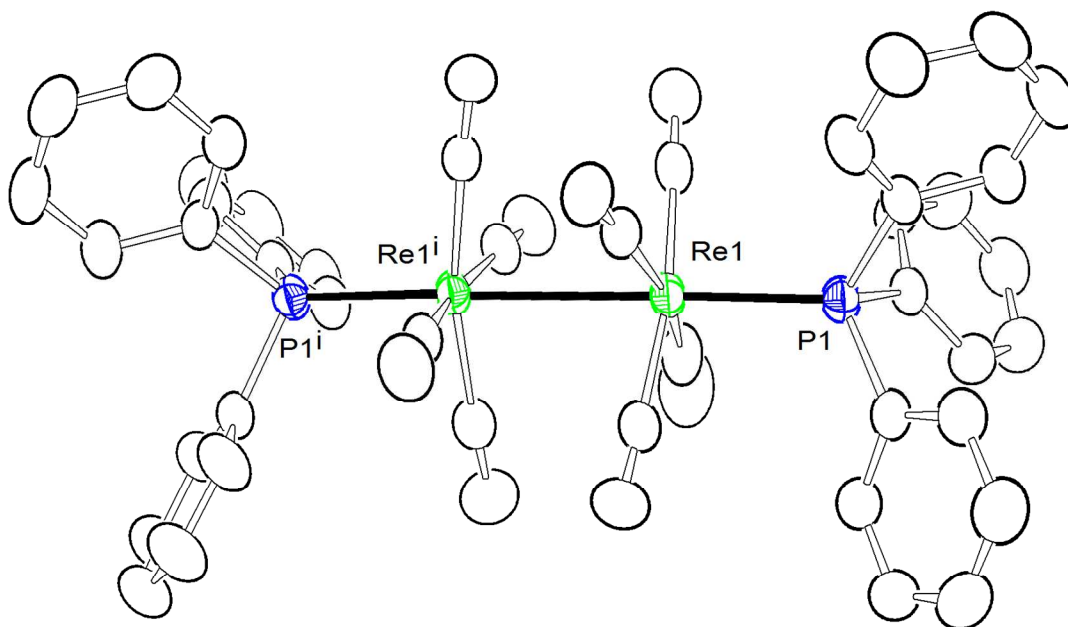

**Figure S1.** An ORTEP diagram of the molecular structure of  $ax,ax\text{-Re}_2(\text{CO})_8(\text{PPh}_3)_2$  showing 40% thermal ellipsoid probability. The hydrogen atoms are omitted for clarity. Selected interatomic bond distances (Å) and angles (°) are as follow:  $\text{Re1} - \text{Re1}^i = 3.0643(3)$ ,  $\text{Re1} - \text{C1} = 1.969(4)$ ,  $\text{Re1} - \text{C4} = 1.973(4)$ ,  $\text{Re1} - \text{C2} = 1.977(4)$ ,  $\text{Re1} - \text{C3} = 1.979(4)$ ,  $\text{Re1} - \text{P1} = 2.3910(9)$ ;  $\text{P1} - \text{Re1} - \text{Re1} = 177.75(2)$

**Table 1. Crystallographic Data for Compounds 1, 3 and Re<sub>2</sub>(CO)<sub>8</sub>(PPh<sub>3</sub>)<sub>2</sub>.**

| Compound                                                              | <b>1</b>                                            | <b>3</b>                                             | ax,ax-Re <sub>2</sub> (CO) <sub>8</sub> (PPh <sub>3</sub> ) <sub>2</sub>      |
|-----------------------------------------------------------------------|-----------------------------------------------------|------------------------------------------------------|-------------------------------------------------------------------------------|
| Empirical formula                                                     | AuRePO <sub>4</sub> C <sub>22</sub> H <sub>15</sub> | AuReIPO <sub>8</sub> C <sub>26</sub> H <sub>15</sub> | Re <sub>2</sub> P <sub>2</sub> O <sub>8</sub> C <sub>44</sub> H <sub>30</sub> |
| Formula weight                                                        | 1514.95                                             | 1182.62                                              | 1121.04                                                                       |
| Crystal system                                                        | Monoclinic                                          | Monoclinic                                           | Monoclinic                                                                    |
| Lattice parameters                                                    |                                                     |                                                      |                                                                               |
| <i>a</i> (Å)                                                          | 9.2034(2)                                           | 12.1444(17)                                          | 13.8222(7)                                                                    |
| <i>b</i> (Å)                                                          | 14.6713(2)                                          | 18.231(3)                                            | 26.6145(13)                                                                   |
| <i>c</i> (Å)                                                          | 16.4820(3)                                          | 14.795(2)                                            | 11.1011(5)                                                                    |
| $\alpha$ (deg)                                                        | 90.00                                               | 90.00                                                | 90.00                                                                         |
| $\beta$ (deg)                                                         | 101.35                                              | 112.643(2)                                           | 103.976(1)                                                                    |
| $\gamma$ (deg)                                                        | 90.00                                               | 90.00                                                | 90.00                                                                         |
| <i>V</i> (Å <sup>3</sup> )                                            | 2181.98(7)                                          | 3023.3(7)                                            | 3962.9(3)                                                                     |
| Space group                                                           | <i>P</i> 2 <sub>1</sub> /n                          | <i>P</i> 2 <sub>1</sub> /c                           | <i>C</i> 2/c                                                                  |
| Z value                                                               | 2                                                   | 4                                                    | 4                                                                             |
| $\rho_{\text{calc}}$ (g / cm <sup>3</sup> )                           | 2.306                                               | 2.598                                                | 1.879                                                                         |
| $\mu$ (Mo K $\alpha$ ) (mm <sup>-1</sup> )                            | 12.36                                               | 13.95                                                | 6.24                                                                          |
| Temperature (K)                                                       | 294(2)                                              | 294(2)                                               | 294(2)                                                                        |
| 2 $\Theta_{\text{max}}$ (°)                                           | 50.06                                               | 50.06                                                | 50.06                                                                         |
| No. Obs. ( <i>I</i> > 2 $\sigma$ ( <i>I</i> ))                        | 3559                                                | 4027                                                 | 3159                                                                          |
| No. Parameters                                                        | 262                                                 | 352                                                  | 253                                                                           |
| Goodness of fit (GOF)                                                 | 1.078                                               | 1.112                                                | 1.027                                                                         |
| Max. shift in cycle                                                   | 0.004                                               | 0.09                                                 | 0.006                                                                         |
| Residuals <sup>a</sup> : R1; wR2                                      | 0.0192; 0.0434                                      | 0.0671; 0.1741                                       | 0.0197; 0.0472                                                                |
| Absorption                                                            | Multi-scan                                          | Multi-scan                                           | Multi-scan                                                                    |
| Correction,<br>Max/min                                                | 1.000 / 0.533                                       | 1.000 / 0.484                                        | 1.000 / 0.622                                                                 |
| Largest peak in Final<br>Diff. Map (e <sup>-</sup> / Å <sup>3</sup> ) | 0.79                                                | 2.34                                                 | 1.03                                                                          |

<sup>a</sup> R1 =  $\sum_{\text{hkl}} (|F_{\text{obs}}| - |F_{\text{calc}}|) / \sum_{\text{hkl}} |F_{\text{obs}}|$ ; wR2 =  $[\sum_{\text{hkl}} w(|F_{\text{obs}}| - |F_{\text{calc}}|)^2 / \sum_{\text{hkl}} wF_{\text{obs}}^2]^{1/2}$ ,  
 $w = 1/\sigma^2(F_{\text{obs}})$ ; GOF =  $[\sum_{\text{hkl}} w(|F_{\text{obs}}| - |F_{\text{calc}}|)^2 / (n_{\text{data}} - n_{\text{vari}})]^{1/2}$ .

**Computational Details.** Density functional theory (DFT) calculations were performed with the Amsterdam Density Functional (ADF) suite of programs<sup>3</sup> by using the PBEsol functional<sup>4</sup> with valence quadruple- $\zeta$  + 4 polarization function, relativistically optimized (QZ4P) basis sets for rhenium and gold, valence triple- $\zeta$  + 2 polarization function (TZ2P) basis set for iodide and double- $\zeta$  function (DZ) basis sets for the phosphorus, carbon, oxygen, and hydrogen atoms with none frozen cores. The molecular orbitals for **1** – **4** and  $\text{Re}_2(\text{CO})_{10}$  and their energies were determined by geometry-optimized calculations, with scalar relativistic corrections, that were initiated by using the atom positional parameters as determined from the crystal structure analyses.<sup>5,6</sup> Electron densities at the bond critical points and Mayer bond orders were calculated by using the Bader Quantum Theory of Atoms In a Molecule (QTAIM) model.<sup>7,8</sup> Natural bond orbital (NBO) analyses were performed using GENNBO 6.0 package embedded in ADF 2013.<sup>9</sup> Time-dependent DFT (TDDFT) calculations were performed for models in the gas phase by using the PBEsol functional with the same basis sets.

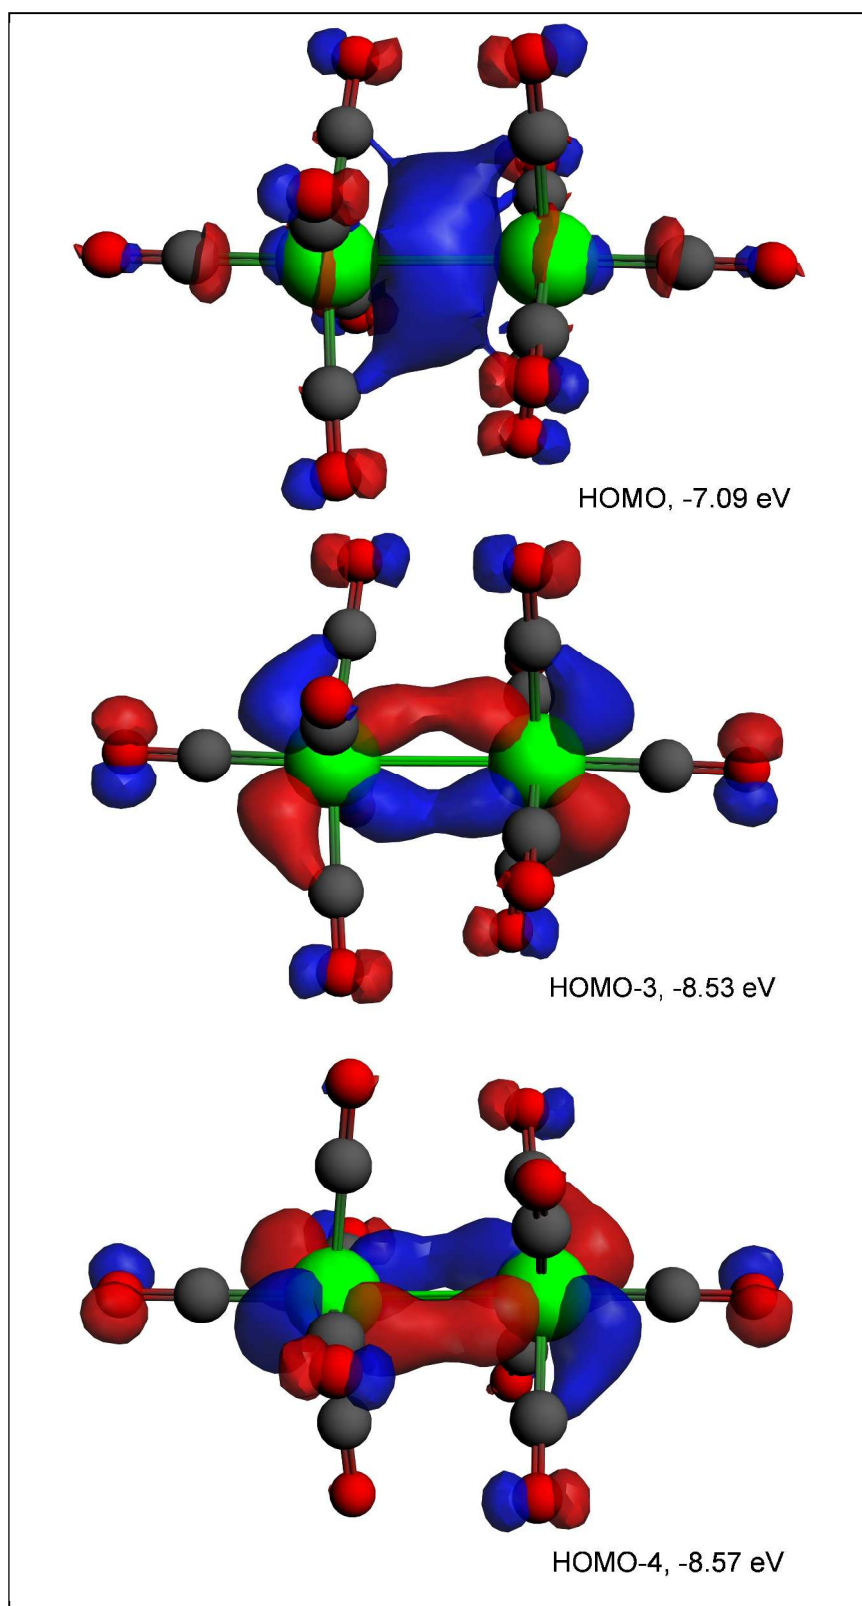

**Figure S2.** Selected PBEsol molecular orbital diagrams with calculated energies for  $\text{Re}_2(\text{CO})_{10}$  showing the Re – Re bonding: HOMO, HOMO-3 and HOMO-4. Isovalue = 0.04.

## References

- 1) SAINT+ Version 6.2a. Bruker Analytical X-ray System, Inc., Madison, Wisconsin, USA, 2001.
- 2) Sheldrick, G. M., SHELXTL Version 6.1; Bruker Analytical X-ray Systems, Inc., Madison, Wisconsin, USA, 1997.
- 3) ADF2013; SCM Theoretical Chemistry, Vrije Universiteit, Amsterdam, The Netherlands, <http://www.scm.com>.
- 4) Perdew, J. P.; Ruzsinszky, A.; Csonka, G. I.; Vydrov, O. A.; Scuseria, G. E. *Phys. Rev. Lett.* **2008**, *100*, 136406.
- 5) Masciocchi, N.; Sironi, A.; D'Alfonso, D. *J. Am. Chem. Soc.* **1990**, *112*, 9395 – 9397.
- 6) Darst, K. P.; Lenhert, P. G.; Lukehart, C. M.; Warfield, L. T. *J. Organomet. Chem.* **1980**, *195*, 317 – 324.
- 7) (a) Bader, R. F. W. *Atoms in Molecules: A Quantum Theory*, Oxford, Clarendon, 1990.  
(b) Cortés-Guzmán, F.; Bader, R. F. W. *Coord. Chem. Rev.* **2005**, *249*, 633 - 662.
- 8) AIMAll, Version 12.11.09, Keith, T. A. TK Gristmill Software, Overland Park KS, USA, 2012 ([aim.tkgristmill.com](http://aim.tkgristmill.com)).
- 9) a) Glendening, E. D.; Badenhoop, J. K.; Reed, A. E.; Carpenter, J. E.; Bohmann, J. A.; Morales, C. M.; Weinhold, F. *NBO 5.0*. Theoretical Chemistry Institute, University of Wisconsin, Madison, 2001. b) Weinhold, F.; Landis, C. R., *Valency and Bonding: A Natural Bond Order Donor-Acceptor Perspective*; Cambridge University Press: Cambridge, U.K., 2005; pp 32–36.
